1 **The distribution of antibiotic use and its association with antibiotic resistance**

2  
3 Scott W. Olesen<sup>1</sup>, Michael L. Barnett<sup>2,3</sup>, Derek R. MacFadden<sup>4</sup>, John S. Brownstein<sup>5,6</sup>, Sonia  
4 Hernández-Díaz<sup>7</sup>, Marc Lipsitch<sup>1,7,8</sup>, Yonatan H. Grad<sup>1,9</sup>

5  
6 1 Department of Immunology and Infectious Diseases, Harvard T. H. Chan School of Public  
7 Health, Boston, Massachusetts 02115

8  
9 2 Department of Health Policy and Management, Harvard T. H. Chan School of Public Health,  
10 Boston, Massachusetts 02115

11  
12 3 Division of General Internal Medicine and Primary Care, Department of Medicine, Brigham  
13 and Women's Hospital, Harvard Medical School, Boston, Massachusetts 02115

14  
15 4 Division of Infectious Diseases, Department of Medicine, University of Toronto, Toronto,  
16 Ontario, Canada M5S 1A1

17  
18 5 Boston Children's Hospital, Boston, Massachusetts 02115

19  
20 6 Harvard Medical School, Boston, Massachusetts 02115

21  
22 7 Department of Epidemiology, Harvard T. H. Chan School of Public Health, Boston,  
23 Massachusetts 02115

24  
25 8 Center for Communicable Disease Dynamics, Harvard T. H. Chan School of Public Health,  
26 Boston, Massachusetts 02115

27  
28 9 Division of Infectious Diseases, Department of Medicine, Brigham and Women's Hospital,  
29 Harvard Medical School, Boston, Massachusetts 02115

30  
31 Correspondence:

32 Yonatan Grad

33 Harvard T. H. Chan School of Public Health

34 665 Huntington Ave, Building 1, Room 715, Boston, Massachusetts 02115

35 617 432 2275

36 [ygrad@hsph.harvard.edu](mailto:ygrad@hsph.harvard.edu)

37

38 **Abstract**

39 Antibiotic use is a primary driver of antibiotic resistance. However, antibiotic use can be  
40 distributed in different ways in a population, and the association between the distribution of use  
41 and antibiotic resistance has not been explored. Here we tested the hypothesis that repeated use  
42 of antibiotics has a stronger association with population-wide antibiotic resistance than broadly-  
43 distributed, low-intensity use. First, we characterized the distribution of outpatient antibiotic use  
44 across US states, finding that antibiotic use is uneven and that repeated use of antibiotics makes  
45 up a minority of antibiotic use. Second, we compared antibiotic use with resistance for 72  
46 pathogen-antibiotic combinations across states. Finally, having partitioned total use into  
47 extensive and intensive margins, we found that intense use had a weaker association with  
48 resistance than extensive use. If the use-resistance relationship is causal, these results suggest  
49 that reducing total use and selection intensity will require reducing broadly-distributed, low-  
50 intensity use.

51

## 52 **Introduction**

53 Antibiotic use is a primary driver of antibiotic resistance, and reducing antibiotic use is a central  
54 strategy for combatting resistance (1, 2). Understanding the relationship between antibiotic use  
55 and antibiotic resistance is therefore critical for the design of rational antibiotic stewardship  
56 strategies. Multiple studies have identified cross-sectional relationships between antibiotic use  
57 and resistance, especially across European countries and US states (3–9). In general, these  
58 studies compare total outpatient antibiotic use with population-level resistance. However,  
59 antibiotic use is generally not evenly distributed. A study of outpatient prescribing in the UK  
60 found that 30% of patients were prescribed at least one antibiotic per year, with the top 9% of  
61 patients receiving 53% of all antibiotics (10). A study of beneficiaries of Medicare, a national  
62 health insurance program that covers that vast majority of Americans 65 and older, found that the  
63 proportion of beneficiaries who take antibiotics varies by US state and drug class (11). In some  
64 cases, antibiotic courses can last for months or even years (12, 13). Because antibiotic use is  
65 uneven, total use does not distinguish between broad use—many people receiving a few  
66 prescriptions—and intense use—a few people receiving many prescriptions (14).

67  
68 It stands to reason that the distribution of antibiotic use, not just total use, could have an effect on  
69 resistance (15). There are a few studies of the relationship between repeated antibiotic exposure  
70 on antibiotic resistance (16–22), and it remains unclear whether broad use or intense use is  
71 associated with population-level resistance. For example, if a first course of antibiotics given to  
72 an antibiotic-naive patient clears most of the susceptible bacteria they carry, then a second course  
73 in the same patient will have only a small effect, since most susceptible bacteria were already  
74 eliminated. Giving that second course to a different, antibiotic-naive patient instead would have a

75 greater effect on population-level resistance. On the other hand, multiple courses given to a  
76 single patient might have a synergistic effect on resistance.

77

78 The goal of this study was to test the hypothesis that intense antibiotic use has a stronger  
79 association with population-level resistance than broad, low-level antibiotic use. We used an  
80 ecological design to compare the distribution of antibiotic use with antibiotic resistance.

81 Although an ecological design is potentially subject to confounders and cannot definitively test  
82 for the causal effect of the distribution of use on resistance at the individual level, ecological  
83 studies of use and resistance are the most feasible design for studying the relationship between  
84 antibiotic use and population-level resistance, and the results of ecological designs play an  
85 important role in developing antibiotic stewardship policies (23, 24).

86

87 To test this hypothesis, we first characterized the distribution of outpatient antibiotic use in two  
88 US nationwide pharmacy prescription claims databases, Truven Health MarketScan Research  
89 Database (25) and Medicare, both covering 2011-2014. We considered only outpatient antibiotic  
90 prescribing, which accounts for 80-90% of total medical antibiotic use in the UK and Sweden  
91 (26, 27) and is presumed to account for a similar fraction in the US (28). Unlike antibiotic sales  
92 data and nationwide healthcare surveys (29), MarketScan and Medicare claims data, which have  
93 previously been used to characterize variations in antibiotic use (11, 30–32), provide longitudinal  
94 prescribing information about individual people, which can distinguish between many people  
95 getting a few prescriptions and a few people getting many prescriptions. We characterized the  
96 distribution of antibiotic use across US states by partitioning annual total use as the sum of  
97 annual first use—individuals' first pharmacy fill for an antibiotic in a calendar year—and annual

98 repeat use—pharmacy fills beyond individuals’ first ones in a calendar year. Second, we  
99 compared annual total antibiotic use with antibiotic resistance as measured in ResistanceOpen, a  
100 US nationwide sample of antibiotic susceptibility reports, for 2012-2015 (i.e., lagged by one year  
101 (8, 33)), evaluating the relationship between use and resistance across US states for 72 pathogen-  
102 antibiotic combinations. Finally, we evaluated whether annual first use and annual repeat use are  
103 differently associated with population-level resistance.

104

## 105 **Results**

### 106 *Antibiotic use is not evenly distributed*

107 Our analysis included 99.8 million outpatient pharmacy antibiotic prescription fills among 62.4  
108 million unique people, approximately 20% of the US population, during 2011-2014 using the  
109 MarketScan database (25). In 2011, 34% of people received an antibiotic, and 10% of people  
110 received 57% of all antibiotic prescriptions. This distribution varied by population but was  
111 similar across data years (Figure 1 - Figure Supplement 1). To characterize the distribution of  
112 specific antibiotics, we grouped individual antibiotic generic formulations into drug groups based  
113 on their chemical structures and mechanisms of action (Supplementary File 1 - Table 1). For all  
114 drug groups, most people had zero prescriptions for that antibiotic in a given year, but antibiotics  
115 differed in their distributions (Figure 1).

116

117 We next examined the distribution of antibiotic use for each drug group and US state. To  
118 quantify the distribution of antibiotic use, we labeled each antibiotic pharmacy claim as “first” if  
119 it was the first pharmacy fill for that drug group made by that individual in that calendar year,  
120 and “repeat” if it was a second, third, etc. fill for an antibiotic in the same drug group made by

121 the same individual in the same calendar year. An individual's first and repeat claims in a  
122 calendar year add up to their total number of claims for that year. We then partitioned  
123 population-level annual total use, measured as pharmacy fills per 1,000 members per year, into  
124 the sum of annual first use, measured as first fills per 1,000 members per year, and repeat use,  
125 measured as repeat fill per 1,000 members per year, for each drug group and US state. Annual  
126 first use of a drug group is equivalent to the proportion of the population taking an antibiotic in  
127 that group in that year.

128  
129 Total use varied between drug groups and across states (Figure 2). Annual repeat use made up a  
130 steady one-quarter to one-third of annual total use across drugs and states, with the exception of  
131 tetracyclines, for which high repeat use was associated with young adults (Figure 2 – Figure  
132 Supplements 1 and 2), probably for acne treatment. This distribution of first and repeat use is  
133 distinct from the pattern predicted by the single-parameter Poisson and geometric distributions  
134 (Figure 2), but the ratio of first use to repeat use for each drug was nearly constant across US  
135 Census regions (Figure 2 – Figure Supplement 3). Thus, the higher antibiotic use in the Southern  
136 states (11, 34) is primarily attributable to a greater proportion of people taking antibiotics, not  
137 because those who receive antibiotics receive more of them.

138  
139 *Landscape of correlations between total use and resistance across pathogens and antibiotics*

140 To verify that our antibiotic use and resistance data sources could be used to distinguish the  
141 associations of first use and repeat use with antibiotic resistance, we first measured the landscape  
142 of Spearman correlations between total use and antibiotic resistance for multiple pathogens and  
143 antibiotics (3–8). To measure antibiotic resistance, we used a US nationwide sample of hospital

144 antibiotic susceptibility reports (35), which included resistance of 38 pathogens to 37 antibiotics  
145 in 641 antibiotic susceptibility reports from 230 organizations (hospitals, laboratories, and  
146 surveillance units) spread over 44 US states. Although most organizations contributing antibiotic  
147 susceptibility reports were hospitals, hospital antibiotic susceptibility reports are biased toward  
148 community-acquired organisms (36, 37), and studies often compare hospital antibiotic  
149 susceptibility reports with community antibiotic use (38).

150

151 Because the epidemiology and pharmacology of each pathogen-antibiotic combination is unique,  
152 each combination could have a unique use-resistance relationship (15). We therefore aggregated  
153 antibiotic resistance into the same drug groups with which we aggregated antibiotic use  
154 (Supplementary File 1 – Table 1) and evaluated the 72 pathogen-antibiotic combinations that  
155 were adequately represented in the antibiotic resistance data (see Methods). Across those 72  
156 combinations, correlation coefficients ranged from –32% to 64% (Figure 3, Supplementary File  
157 1 - Table 2). The strongest correlation (Spearman's  $\rho = 64\%$ , 95% CI 41 to 80%) was between  
158 macrolide use and the proportion of *Streptococcus pneumoniae* isolates that were macrolide  
159 nonsusceptible (Figure 4). Correlation coefficients were mostly positive (median correlation  
160 coefficient 21%, IQR 8 to 34%). Use-resistance correlations involving macrolides, quinolones,  
161 and cephalosporins were more positive than those for nitrofurantoin, and correlations involving  
162 quinolones were more positive than those for trimethoprim/sulfamethoxazole (pairwise Mann-  
163 Whitney tests, two-tailed, FDR = 0.05). Coefficients were not significantly more positive for any  
164 particular pathogen.

165

166 Because isolates from older adults are disproportionately represented in antibiotic susceptibility  
167 reports (39), we suspected that population-wide resistance might, in some cases, correlate better  
168 with antibiotic use among older adults. We therefore queried outpatient pharmacy antibiotic  
169 claims records from individuals 65 and older on Medicare (see Methods). When antibiotic use  
170 among Medicare beneficiaries was substituted for antibiotic use as measured in the MarketScan  
171 data (Figure 2 – Figure Supplement 2), correlation coefficients were similar (Supplementary File  
172 1 – Tables 2 and 3). Conversely, children are the primary carriers for some pathogens (e.g.,  
173 *Streptococcus pneumoniae* (40)), so we suspected that resistance might, in other cases, better  
174 correlate with children’s antibiotic use. Restricting the antibiotic use data to members at most 15  
175 years old (Figure 2 – Figure Supplement 2) again yielded similar coefficients (Supplementary  
176 File - Tables 2 and 3). Thus, the landscape of correlations we observed was mostly robust to the  
177 exact population and data source.

178

179 We also evaluated the sensitivity of the results to the measurement of antibiotic use, substituting  
180 days supply of antibiotic for number of pharmacy fills, and the geographic level of the analysis,  
181 by aggregating the Medicare use data and resistance data at the level of the 306 hospital referral  
182 regions intended to approximate regional health care markets (41) (Supplementary File – Tables  
183 2 and 3). The absolute values of the correlation coefficients were slightly closer to zero when  
184 using days supply rather than fills (Wilcoxon test, two-tailed; pseudomedian difference in  
185 absolute correlation coefficient 1.9 percentage points, 95% CI 0.72 to 3.1) and substantially  
186 closer to zero when using hospital referral regions rather than states as the units of analysis (6.1  
187 percentage points, 95% CI 3.0 to 9.1).

188



189 *Lack of evidence for more positive association with repeat use*

190 Having examined the landscape of the relationships between total use and resistance across  
191 pathogen-antibiotic combinations, we set out to test the hypothesis that repeat use has a stronger  
192 association with resistance than first use. For each pathogen-antibiotic combination, we  
193 performed a multiple regression predicting proportion nonsusceptible from first use and repeat  
194 use (Figure 5). First use and repeat use are highly correlated in some cases (Supplementary File -  
195 - Table 4) which will widen the confidence intervals on the regression coefficients but should not  
196 introduce bias (42). Regression coefficients for first use were more often positive than negative  
197 (54 of 72 [75%]; binomial test, 95% CI 63 to 84%). That is, first use was positively associated  
198 with resistance when controlling for repeat use. In contrast, regression coefficients for repeat use  
199 were more often negative than positive (44 of 72 [61%]; binomial test, 95% CI 49 to 72%). That  
200 is, repeat use was negatively associated with resistance when controlling for first use.

201  
202 We evaluated the sensitivity of this result to age group, data source, metric of antibiotic use, and  
203 geographic unit of analysis, as described above. In all cases, regression coefficients for first use  
204 in the multiple regression were more likely to be positive than negative, while regression  
205 coefficients for repeat use were more likely to be negative than positive (Supplementary File 1 -  
206 Table 5). For certain pathogens and antibiotics, resistance could presumably accumulate in an  
207 individual over many years (18, 21), so we also computed alternate measures of first and repeat  
208 use by considering only individuals who were included in the MarketScan data for each year of  
209 2011-2014, and we labeled an antibiotic fill as first use only if it was the first fill for that drug  
210 group made by that individual in the entire four-year period. In that analysis, a similar proportion  
211 of regression coefficients for first use were positive (69%, 95% CI 57 to 80%) and regression

212 coefficients for repeat use were equally likely to be positive or negative (53%, 95% CI 41 to  
213 65%).

214

## 215 **Discussion**

### 216 *Landscape of use-resistance relationships*

217 We used US nationwide datasets measuring antibiotic use in 60 million individual and antibiotic  
218 resistance in 3 million bacterial isolates to analyze relationships between antibiotic use and  
219 resistance, examining 72 pathogen-antibiotic combinations simultaneously, using identical data  
220 sources and analytical methods across combinations. Although previous studies have examined  
221 multiple pathogen-antibiotic combinations, usually no more than 5 pathogens or antibiotics are  
222 considered at once (3, 4, 8). We found that correlations between total use and resistance were  
223 mostly positive, that certain drugs tended to have more positive correlations, but that there was  
224 no clear pattern by organism (6). The overall landscape of correlations was mostly robust to the  
225 age groups studied and the geographic scale of the analysis, although correlations were  
226 somewhat weaker when conducting analysis at smaller geographic scales (8, 43–45). We used  
227 outpatient antibiotic use as the predictor of resistance because 80-90% of antibiotic use occurs in  
228 the outpatient setting (28) and because most antibiotic pressure on pathogens is due to “bystander  
229 selection”, in which the patient is treated for some reason other than an infection caused by that  
230 pathogen (46).

231

232 The correlations we observed between total antibiotic use and population-wide antibiotic  
233 resistance were noticeably weaker than those in highly cited European studies but comparable to  
234 those from other analyses of European data. For example, for *S. pneumoniae* and macrolides,

235 Goossens *et al.* (3) reported a Spearman's  $\rho$  of 83% and García-Rey *et al.* (4) reported 85%,  
236 while we found 62% and van de Sande-Bruinsma *et al.* (8) reported a median of 56%. These  
237 studies all used similar statistical methods, so the differences in the results must be due to some  
238 other factors (e.g., data quality, range of antibiotic use, distribution of antibiotic use, or pathogen  
239 biology). Correlations between *E. coli* resistance and use of  $\beta$ -lactams, cephalosporins,  
240 trimethoprim/sulfamethoxazole, and quinolones were similar to those reported in studies of use  
241 and resistance in UK primary care groups (43, 44).

242  
243 The most notable difference, however, between our study and previous results from Europe is for  
244 *S. pneumoniae* and  $\beta$ -lactams: Goossens *et al.* (3) report a Spearman's  $\rho$  of 84%, but we found no  
245 relation (−11%, 95% CI −41 to 22%). We propose that the narrow variation in  $\beta$ -lactam use  
246 across US states, approximately two-fold between the highest- and lowest-using states, obscures  
247 a correlation that is more apparent in Europe, where there is a four-fold variation between the  
248 highest- and lowest-using countries (3). Thus, our results and those from Goossens *et al.* may be  
249 consistent with respect to the underlying biology. We also note that, when reproducing the  
250 methodology from a US study (47) of the use-resistance relationship for  $\beta$ -lactams and *S.*  
251 *pneumoniae* (dichotomizing states as high- or low-prescribing and computing the odds ratio of  
252 resistance), we find a consistent point estimate but with wider confidence intervals (1.15, 95% CI  
253 0.75 to 1.76).

254  
255 Our study design may limit the interpretability of the landscape of use-resistance relationships.  
256 First, like the leading European studies using EARS-Net and US studies using the Centers for  
257 Disease Control and Prevention Active Bacterial Core surveillance, we compare population-wide

258 outpatient antibiotic use with antibiotic susceptibility reports from hospitals. The degree to which  
259 hospital antibiotic susceptibility reports represent community infections is debated (36, 38). For  
260 example, if outpatient antibiotic use selects for resistance among community-acquired infections,  
261 and hospital antibiograms reflect data from community-acquired infections as well as unrelated  
262 inpatient resistance patterns, then the correlations we measure would be biased toward weaker  
263 associations. Furthermore, antibiotic use and resistance in the community setting is not  
264 completely independent of use and resistance in the hospital setting (48), and our approach does  
265 not account for any relationship between the two.

266  
267 Second, antibiotic resistance is temporally dynamic, and our cross-sectional approach assumes  
268 that antibiotic use is autocorrelated across years (49) or resistance changes slowly (50). If use  
269 does cause resistance, and use and resistance changed meaningfully over the course of the study,  
270 then the correlations we measured by aggregating over all years would be biased toward weaker  
271 associations.

272  
273 Third, because of the limitations in statistical power, we did not address the possibility that use  
274 of one antibiotic can select for resistance to another antibiotic (51, 52). Notably, use of one  
275 antibiotic can select for resistance to another antibiotic if the dominant clones of that species are  
276 resistant to both (51). In that case, if the use rates of the two drugs are correlated across states,  
277 then the apparent relationship between one drug and resistance to that drug would be biased  
278 upward. Furthermore, because the palette of antibiotic use varies by country (53), and different  
279 pathogen strains circulate in different populations, the univariate associations we observed

280 between use of an antibiotic and resistance to that antibiotic in the US may not be applicable in  
281 other geographies.

282

283 Finally, like in other studies of antibiotic use, we did not address patient adherence, and typical  
284 approaches to address adherence using claims data (54) are problematic when the intended  
285 duration of treatment is not clear. The measured correlation would then be biased if, for example,  
286 poor patient adherence increased resistance and patient adherence were correlated with antibiotic  
287 use.

288

### 289 *Distribution of antibiotic use and antibiotic resistance*

290 We described the distribution of antibiotic use across drug groups and US states, finding that  
291 34% of the study population took an antibiotic in a year, and 10% of the population had 57% of  
292 the antibiotic fills in that year, similar to results from the UK (10), although this distribution  
293 varied by population (Figure 1 – Figure Supplement 1). By partitioning annual total use into  
294 annual first use and annual repeat use, we were able to show that, for each drug, annual first use  
295 makes up the majority of annual total use and that variations in annual first use explain more  
296 variance in annual total use than do variations in annual repeat use. We also found that first use  
297 tends to have a positive association with resistance when controlling for repeat use, while repeat  
298 use tends to have negative or associations with resistance when controlling for first use. This  
299 result held across sensitivity analyses.

300

301 If these associations are causal, that is, if outpatient first and repeat antibiotic use select for  
302 resistance among community-acquired pathogens, then our results would imply that antibiotic

303 resistance in the outpatient setting is due more to first use, which tended to have positive  
304 associations with resistance, than to repeat use. In contrast to proposals to focus on intense  
305 antibiotic users for combatting resistance (10), this situation would imply that preventing  
306 marginal prescriptions among patients whose indications are borderline-appropriate or  
307 inappropriate for antibiotics may be the more effective tactic for reducing the prevalence of  
308 resistance mechanisms already established in the US.

309

310 There are limitations to the interpretability of these results. First, as mentioned above, there is a  
311 potential mismatch between the sources of the antibiotic use and antibiotic resistance data.

312

313 Second, although antibiotic use is a major driver of antibiotic resistance, the observed results  
314 may not be causal. Factors beyond antibiotic use, like population density, play a role in antibiotic  
315 resistance (2, 9). Even if antibiotic use and resistance are causally related, it may be that  
316 resistance affects antibiotic use. For example, if resistance to a drug is high, treatment using that  
317 drug is more likely to fail, discouraging repeated use, so that high resistance lead to decreased  
318 repeat use (36, 43, 51). Ecological studies like this one do not directly address causality, and  
319 further work is needed to distinguish between different causal pathways.

320

321 Third, the observed population-level relationships between antibiotic use and resistance need not  
322 also hold for the relationship between an individual's first and repeat antibiotic use and the risk  
323 of a resistant infection in that individual. Any comparisons between our population-level results  
324 and individual-level studies would need to account for the difference between our population-

325 level measures of first and repeat antibiotic use and the individual-level timing of antibiotic use  
326 and measurements of resistance.

327

328 Fourth, controlling for factors beyond antibiotic use could alter the apparent relationship between  
329 antibiotic use and resistance. In particular, we speculate that controlling for patient morbidity,  
330 which we did not address in this population-level analysis, would amplify the observed result,  
331 that first use tends to have a more positive association with antibiotic resistance than repeat use.  
332 We expect that morbid individuals have more repeat antibiotic use. We also expect that morbid  
333 individuals visit the hospital more often, putting them at higher risk of antibiotic resistant  
334 infections regardless of their antibiotic use. Thus, we speculate that repeat use causes resistance  
335 and also is a predictor of morbidity, which is associated with resistance. Failing to control for  
336 morbidity thus biases the association between repeat use and resistance toward more positive  
337 values. Conversely, controlling for morbidity would decrease the measured relationships  
338 between repeat use and resistance, amplifying our central result.

339

340 Fifth, we defined first and repeat use with respect to the calendar year, while it may be that some  
341 other timescale is the appropriate one for this analysis. Although our central result held when re-  
342 defining first and repeat use with respect to a four-year period (Supplementary File 1 - Table 5),  
343 it may be that, say, repeat use within an individual on a time-scale shorter than a year is an  
344 important determinant for risk of resistance in that individual. Our study does not distinguish  
345 between repeat use that occurs across year boundaries, which is presumably important for  
346 relating individuals' antibiotic use with their risk of resistance.

347

348 Finally, we note that first use and repeat use are only one set of many ways of measuring the  
349 distribution of antibiotic use. For example, 10 repeat uses could mean 1 person with 10 repeat  
350 uses or 10 people with 1 repeat use each. The first and repeat use metrics cannot distinguish  
351 between these two cases, and it may be that some other measure of the distribution of antibiotic  
352 use would yield different results.

353

354 In conclusion, we find that population-wide antibiotic use and population-wide resistance  
355 appears to be more closely linked with broadly-distributed, low-intensity use rather than with  
356 intensity of use. Ultimately, accurate models predicting the emergence and spread of antibiotic  
357 resistance will require more careful characterizations of who gets what antibiotic (55), what  
358 selection pressure that places on pathogens, how those pathogens are transmitted, and in whom  
359 they manifest as infections (56). An ideal study would compare the complete history of an  
360 individual's outpatient and inpatient antibiotic exposure with clinical microbiology data from  
361 that same individual, cross-referenced against population-level factors, among a representative,  
362 nationwide sample of individuals. Individual-level results could then also be compared with  
363 mechanistic models of resistance to draw inferences about within-host effects of antibiotic use  
364 (57, 58), and the role of co-occurring resistance and correlated antibiotic use could be addressed.  
365 In the absence of such a dataset, these ecological, associative results provide a guide to the  
366 development of antibiotic stewardship policy.

367



368 **Methods**

369 *Study population and antibiotic use*

370 MarketScan (25) data covering 2011-2014 were used to identify insurance plan members and  
371 characterize their outpatient antibiotic use. To ensure quality of the antibiotic use distribution  
372 data, only members who were on their insurance plan for 12 months during a given year were  
373 included. Prescription fills for oral and injected antibiotics were identified by generic  
374 formulation (Supplementary File 1 - Table 6) and drug forms (Supplementary File 1 - Table 7).  
375 We treated multiple fills on the same day for the same generic formulation with the same refill  
376 code as a single prescription fill. In the main analysis, antibiotic use was measured using fills,  
377 rather than days supply of drug, because some previous research has suggested that prescriptions  
378 better correlate with resistance (33) and that this choice is probably not detrimental (8, 49). The  
379 specific generic drugs were grouped into antibiotic drug groups designed to correspond to the  
380 antibiotic resistance drug groups described below (Supplementary File 1 - Table 1). All measures  
381 of antibiotic use were computed for each year 2011 to 2014, and the mean for each value across  
382 the 4 years was reported and used in analyses of the use-resistance relationship.

383

384 Antibiotic use among Medicare beneficiaries was measured as previously described (59).

385 Briefly, we considered fee-for-service beneficiaries at least 65 years old among and with 12  
386 months of enrollment in Medicare Part B and Part D among a 20% sample of beneficiaries for  
387 each of 2011-2014. The Medicare data, which provides the zip code for each beneficiary, were  
388 also aggregated at the level of hospital referral region (41), using the 2011 zip code to region  
389 crosswalk. MarketScan data do not include zip code-level resolution.

390

391 This study was deemed exempt from review by the institutional review board at the Harvard T.  
392 H. Chan School of Public Health.

393

#### 394 *Antibiotic resistance*

395 Antibiotic resistance prevalences for common bacterial pathogens were identified from  
396 ResistanceOpen, a previously developed database of spatially localized patterns of antibiotic  
397 resistance (35). This continuously updated database contains antibiotic resistance data from  
398 online sources during 2012 to 2015. At the time of analysis, the resistance data consisted of  
399 approximately 86,000 records, each indicating the fraction of isolates of an organism that were  
400 nonsusceptible to a particular drug in a particular antibiotic susceptibility report (“antibiogram”).  
401 The median number of isolates corresponding to each record was 93, but records had up to  
402 75,000 associated isolates. 7 records (<0.01%) with missing numbers of isolates were excluded.  
403 In antibiograms that separated *S. aureus* into MRSA and MSSA, resistance of aggregate *S.*  
404 *aureus* to individual drugs was taken as the average of the MRSA and MSSA records, weighted  
405 by number of isolates. MRSA and MSSA were not considered as separate species in any  
406 analysis.

407

408 The specific antibiotics used in antibiotic resistance assays were grouped into antibiotic drug  
409 groups (Supplementary File 1 - Table 1) designed to correspond to the antibiotic use groups. If  
410 resistance to more than one antibiotic in a drug group was reported for a particular pathogen in a  
411 particular antibiogram, resistance to that drug group for that pathogen in that antibiogram was  
412 computed as the mean of the resistances measured for the antibiotics in that group, weighted by  
413 the number of isolates. The proportion of nonsusceptible isolates in a state for a particular

414 pathogen-antibiotic combination was computed as the average of the proportions from each  
415 contributing antibiogram in that state, weighted by number of isolates.

416

#### 417 *Statistical methods*

418 Antibiotic use and resistance were compared using Spearman correlations and multiple linear  
419 regressions. Of the 887 pathogen-antibiotic combinations present in the data, we analyzed the 72  
420 combinations that were present in at least 34 states. This excluded 21% of the pathogen-  
421 antibiotic-antibiogram combinations. We established the cut-off for number of states because  
422 80% power to detect a Pearson correlation coefficient of magnitude 0.55 at  $\alpha = 0.01$  under a two-  
423 sided hypothesis requires at least 34 samples. (Although we report Spearman correlations, there  
424 is no straightforward power calculation methodology for Spearman correlations, and we used the  
425 Pearson power calculation as an approximation.) We aggregated data across all years, rather than  
426 comparing use and resistance in each year, because of the sparse of the resistance data: of 2,767  
427 pathogen-antibiotic-state combinations in the data, only 182 have data for all four years. No  
428 pathogen-antibiotic combination had more than 4 states with data for all 4 years. Confidence  
429 intervals on correlation coefficients were computed using the Fisher transformation and normal  
430 approximation method. Multiple comparisons were accounted for using the Benjamini-Hochberg  
431 false discovery rate (FDR) (60). Multiple regressions predicted proportion of isolates  
432 nonsusceptible from first use and repeat use.

433

#### 434 *Data availability*

435 State-level, aggregate antibiotic use and resistance data used in the main analyses are in Figure 3  
436 – Source data 1 and 2. We do not own and cannot publish disaggregated MarketScan or

437 Medicare data. MarketScan data are available by commercial license from Truven Health  
438 ([marketscan.truvenhealth.com](http://marketscan.truvenhealth.com)). Medicare data are available from ResDAC ([www.resdac.org](http://www.resdac.org)).  
439 ResDAC requires an application ensuring that requesting researchers comply with Common  
440 Rule, HIPAA, and CMS security and privacy requirements. Disaggregated ResistanceOpen data  
441 are restricted due to hospitals' privacy concerns. ResistanceOpen data are available by request  
442 from HealthMap ([www.resistanceopen.org](http://www.resistanceopen.org)).

443

#### 444 **Acknowledgements**

445 SWO and ML were supported by cooperative agreement U54GM088558 from the National  
446 Institute of General Medical Sciences. The content is solely the responsibility of the authors and  
447 does not necessarily represent the official views of the National Institute of General Medical  
448 Sciences or the National Institutes of Health.

449

450 **Figures**

451

452 Figure 1. **The distribution of antibiotic use within individuals.** Bars indicate the proportion of  
453 members in the MarketScan data with different numbers of prescription fills in 2011 for each of  
454 the drug groups. TMP/SMX: trimethoprim/sulfamethoxazole.

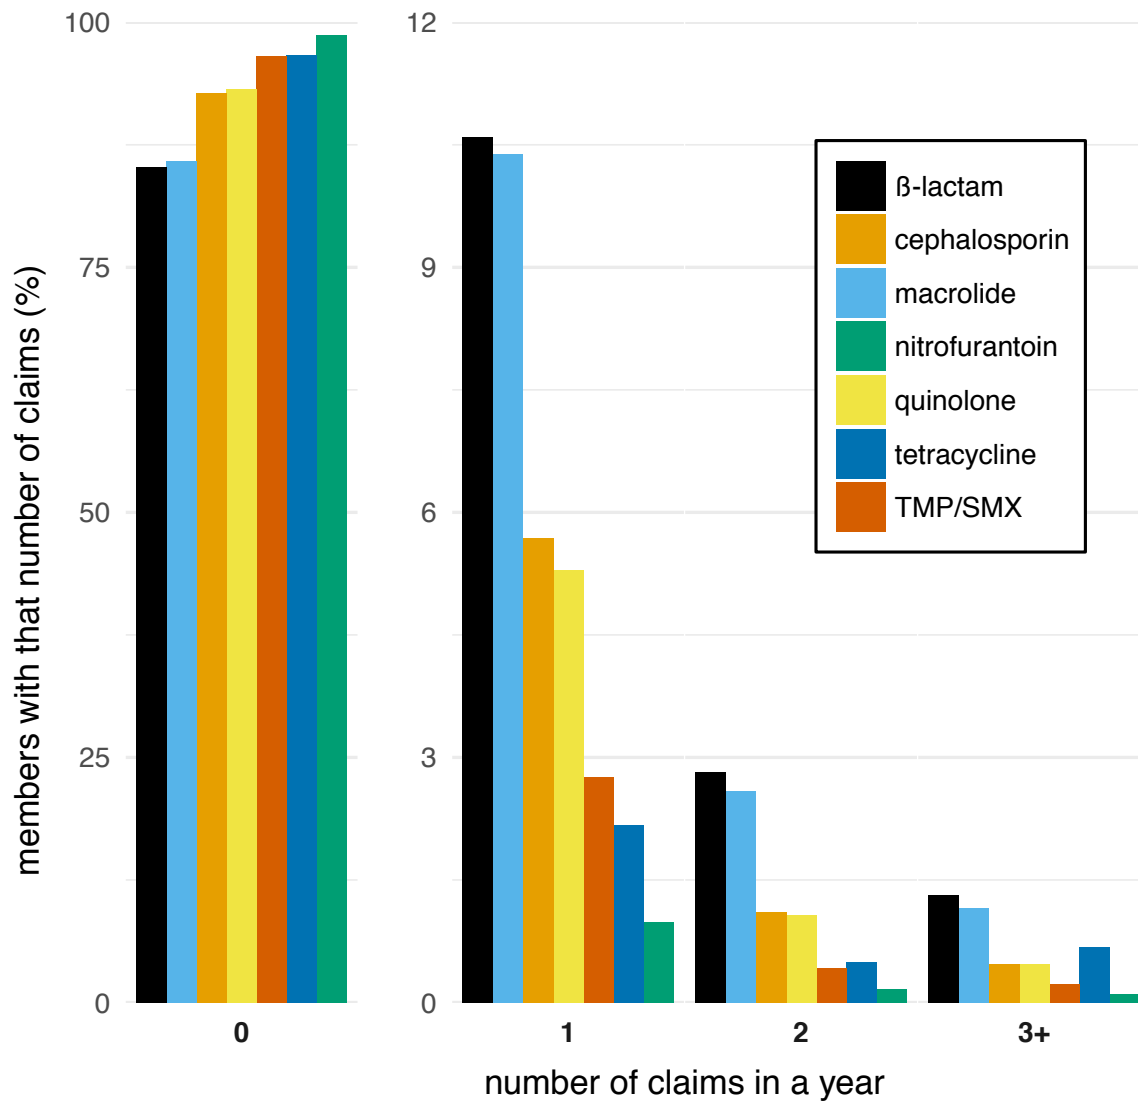

455

456

457 Figure 1 - Figure Supplement 1. **Cumulative distribution of antibiotic use.** Each point  
458 represents a group of people with a certain number of associated claims for any antibiotic,  
459 starting at the left with the members with the greatest number of claims. The upper-right line  
460 segment shows members with 1 claim, the next segment shows members with 2 claims, etc.  
461 Colors indicate data years. Panels indicate study population. MarketScan: main data set.  
462 Children: MarketScan data including only members 15 and younger.

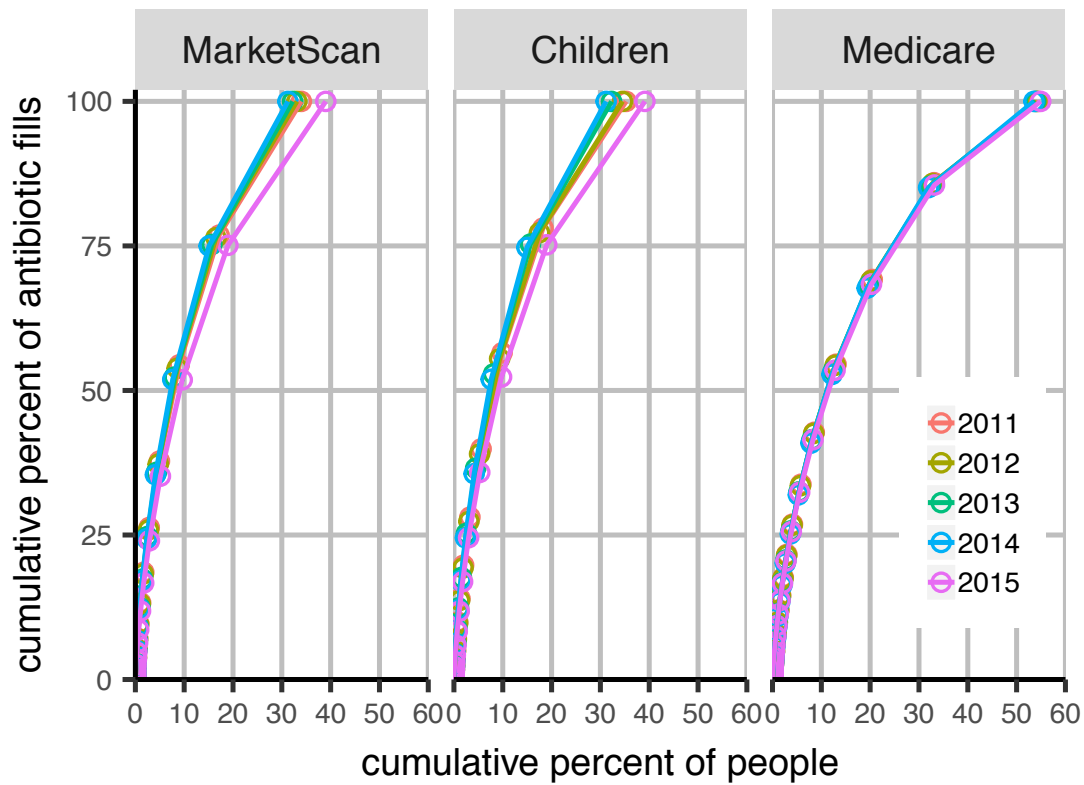

463

464

465 Figure 2. **The distribution of antibiotic use across US states.** Each point indicates first use and  
466 repeat use of a single drug group in a single US state (averaged over the data years). Points  
467 falling on the black line have three times as much first use as repeat use (i.e., repeat use is one-  
468 quarter of total use). The curves show the relationships between first use and repeat use expected  
469 from the Poisson and geometric distributions. TMP/SMX: trimethoprim/sulfamethoxazole.

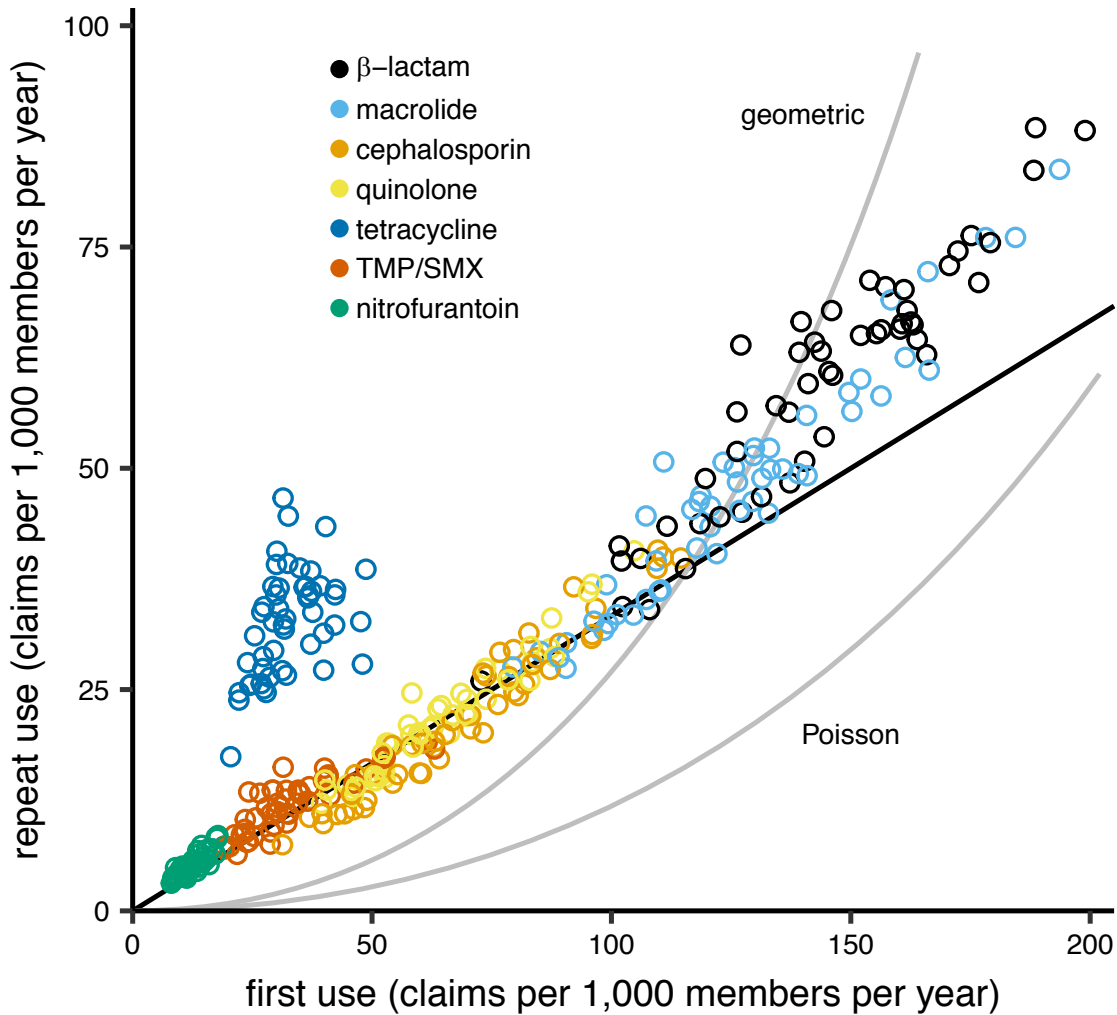

470

471

472 Figure 2 – Figure Supplement 1. **Distribution of tetracycline use by age.** Colors indicate data  
473 years.

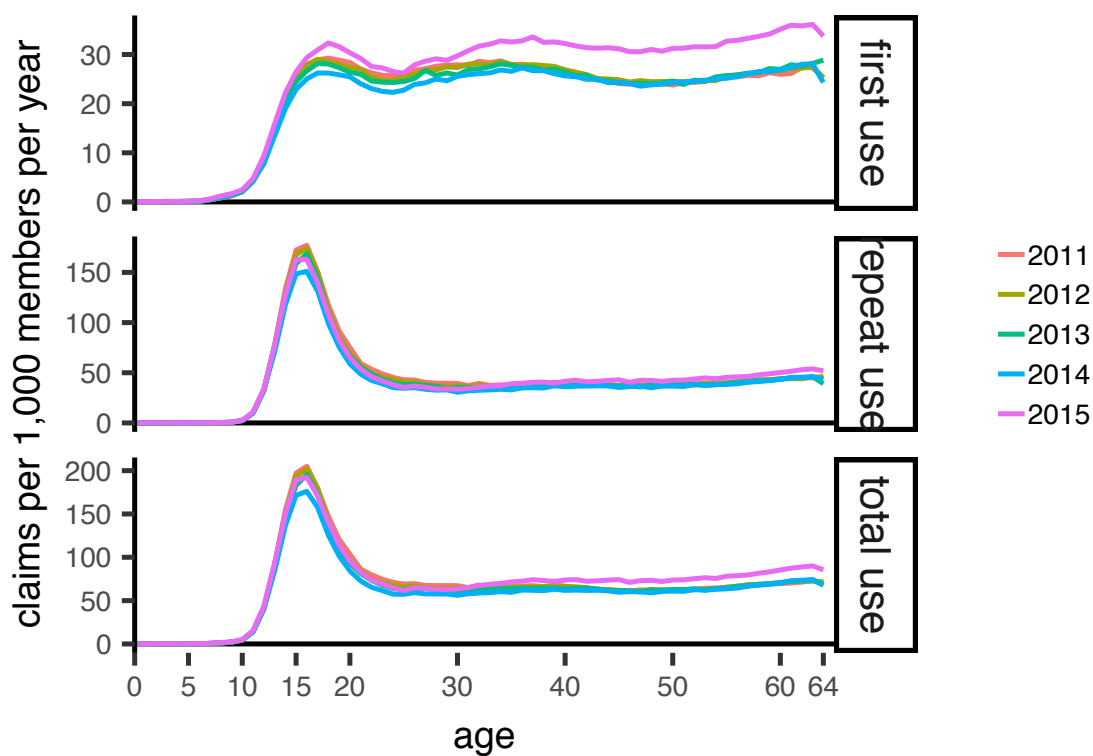

474

475



476 Figure 2 – Figure Supplement 2. **Distribution of antibiotic use by population.** Each point  
477 represents average use of a drug group in a state across data years. Children: MarketScan data  
478 including only members 15 and younger.

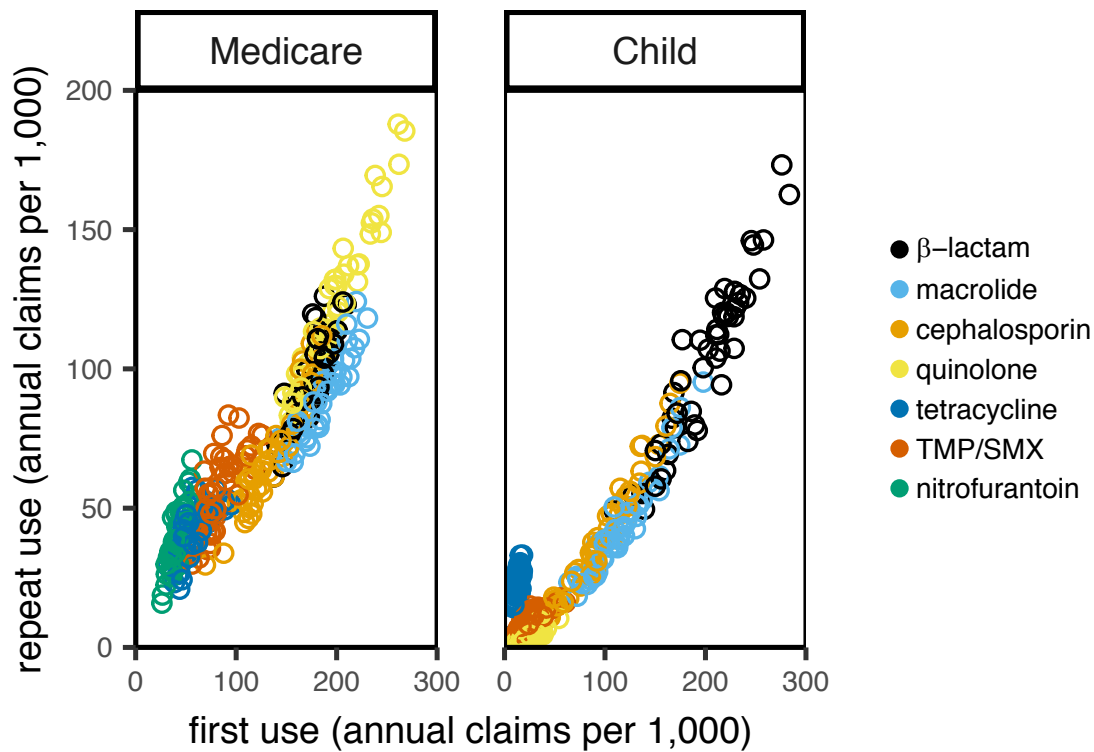

479

480

481 Figure 2 – Figure Supplement 3. **Distribution of antibiotic use by region.** Each point shows use  
482 for a drug group in a state, averaged over data years. Colors indicate US Census region (red,  
483 South; light red, Midwest; gray, Northeast; black, West). Line shows unweighted linear best fit.

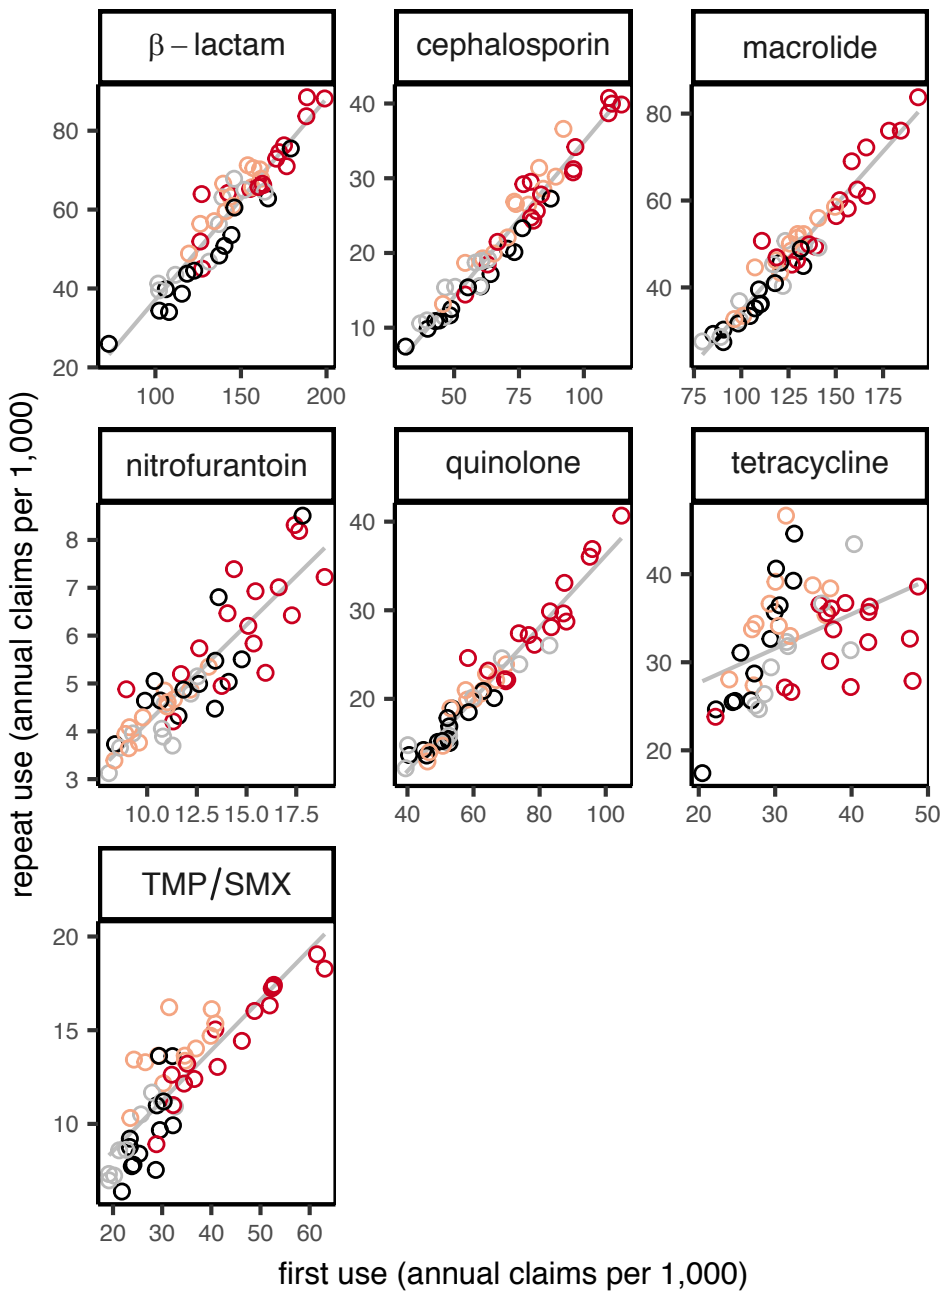

484

485

486 Figure 3. **Correlations between total antibiotic use and resistance are biased toward positive**  
 487 **values.** Error bars show 95% confidence intervals. The color strip visually displays the drug  
 488 groups. Statistical significance is indicated by color of the points (black, significant at FDR =  
 489 0.05, two-tailed; dark gray, significant at  $\alpha = 0.05$ , two-tailed; light gray, not significant).  
 490 TMP/SMX: trimethoprim/sulfamethoxazole. CoNS: coagulase-negative *Staphylococcus*.

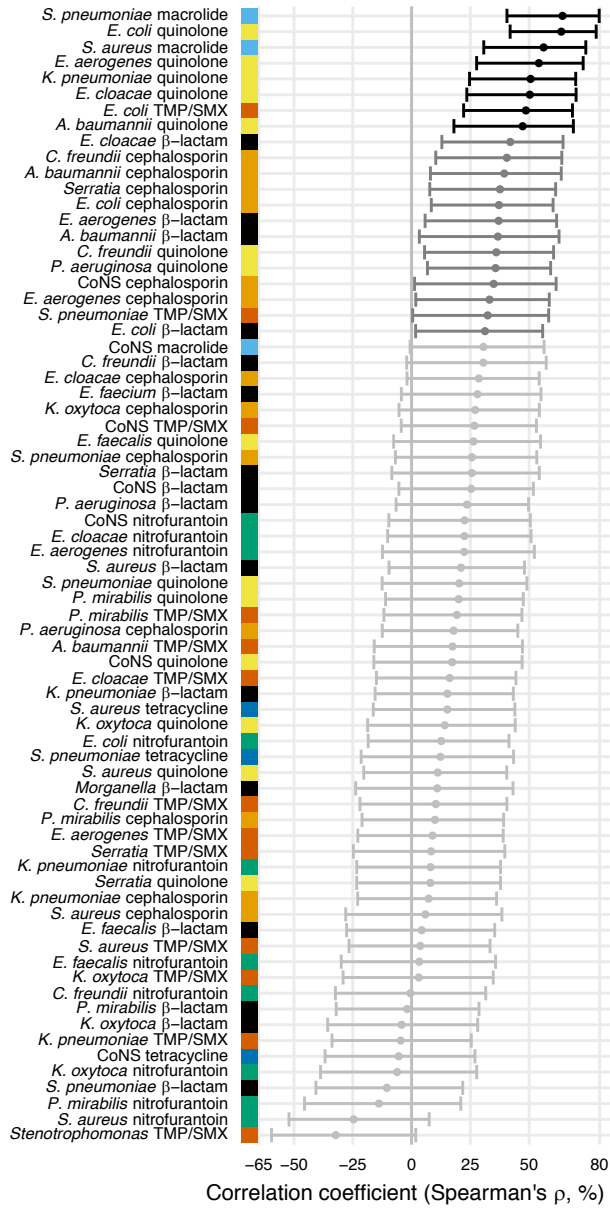

491

492

493 Figure 3 – Source data 1. **Antibiotic use data.** For each data source (MarketScan or Medicare),  
494 data subset or population among MarketScan records, state (with masked ID), and drug group,  
495 annual first and repeat claims per 1,000 members. Main: main data set. Children: members at  
496 most 15 years old. Days supply: first and repeat use are reported as days supply, not claims.  
497 Multiyear: among members in the data for all 4 data years.

498

499 Figure 3 – Source data 2. **Antibiotic resistance data.** For each adequately-represented pathogen  
500 and drug group (see Methods) and state (with masked ID matching the antibiotic use data), the  
501 proportion of isolates collected in that state susceptible to that drug.

502

503

504 Figure 4. Total macrolide use and macrolide resistance among *Streptococcus pneumoniae*  
505 correlate across US states. Labels indicate selected states. Colors indicate US Census region  
506 (red, South; light red, Midwest; gray, Northeast; black, West). Line shows unweighted linear best  
507 fit. Southern states have highest macrolide use and resistance.

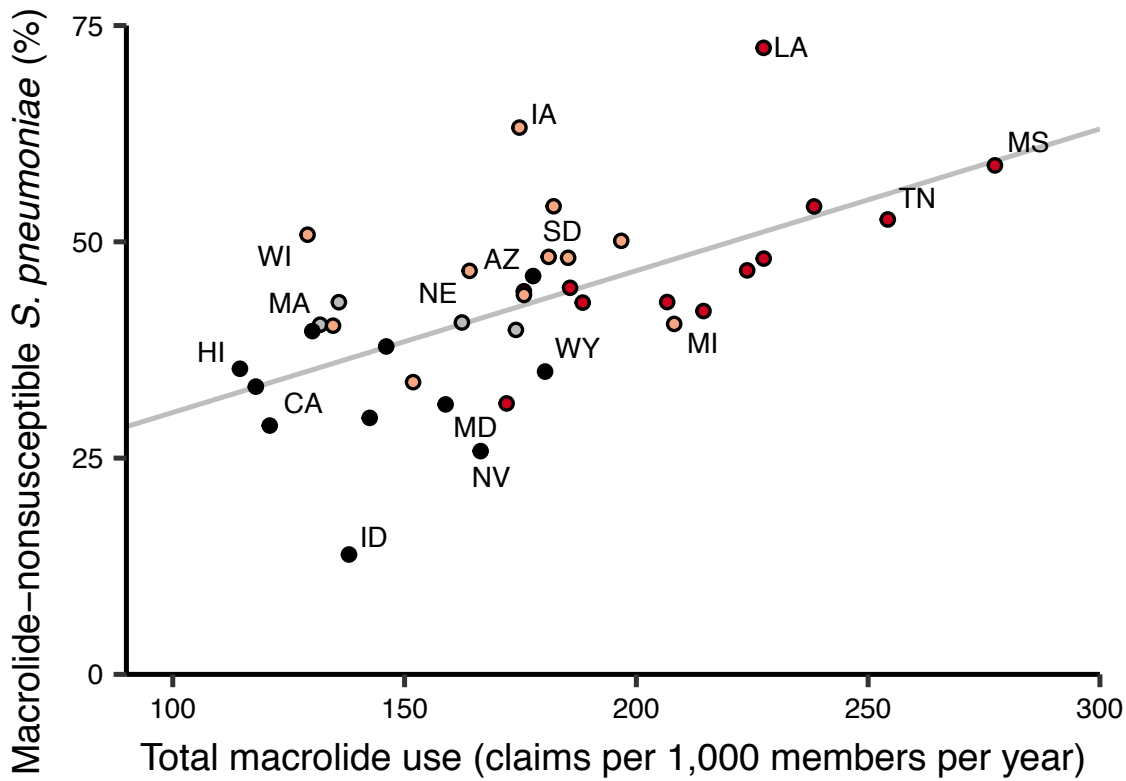

510 Figure 5. **Repeat use tends to be negatively associated with resistance when controlling for**  
511 **first use.** Each point represents a pathogen-antibiotic combination. The position of the point  
512 shows the two coefficients from the multiple regression. The units of the coefficients are  
513 proportion resistant per annual claim per 1,000 people. Color indicates drug group. Error bars  
514 show 95% CIs. (a) All data. (b) Same data, showing only the center cluster of points.

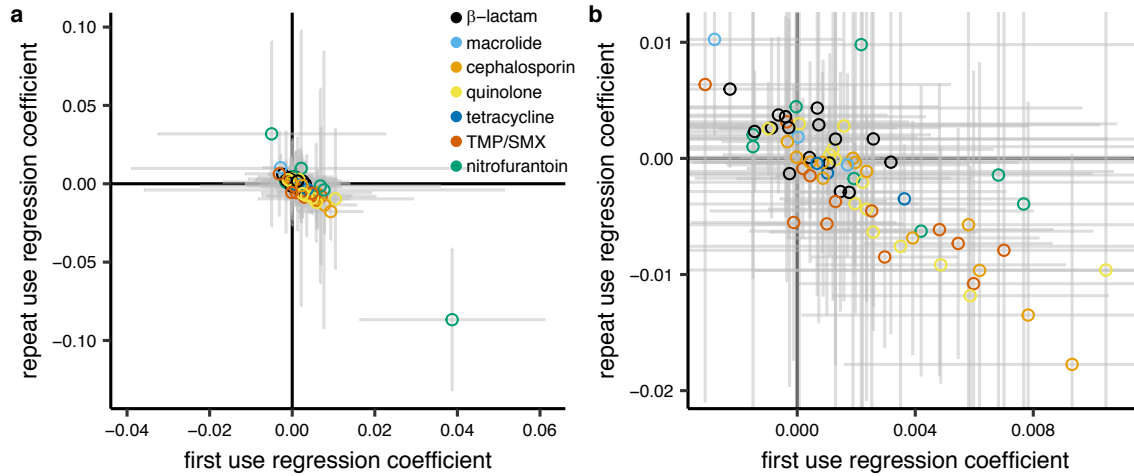

515

516

517 **Supplementary File 1.** Supplemental tables.

518

## 519 References

- 520 1. Gould, M I (1999) A review of the role of antibiotic policies in the control of antibiotic  
521 resistance. *J Antimicrob Chemother* 43(4):459–465.
- 522 2. Harbarth S, Samore MH (2005) Antimicrobial resistance determinants and future control.  
523 *Emerg Infect Dis* 11(6):794–801.
- 524 3. Goossens H, Ferech M, Vander Stichele R, Elseviers M (2005) Outpatient antibiotic use in  
525 Europe and association with resistance: a cross-national database study. *The Lancet*  
526 365(9459):579–587.
- 527 4. Garcia-Rey C, Aguilar L, Baquero F, Casal J, Dal-Re R (2002) Importance of local  
528 variations in antibiotic consumption and geographical differences of erythromycin and  
529 penicillin resistance in *Streptococcus pneumoniae*. *J Clin Microbiol* 40:159–64.
- 530 5. Bronzwaer SLAM, et al. (2002) A European study on the relationship between  
531 antimicrobial use and antimicrobial resistance. *Emerg Infect Dis* 8(3):278–282.
- 532 6. Bell BG, Schellevis F, Stobberingh E, Goossens H, Pringle M (2014) A systematic review  
533 and meta-analysis of the effects of antibiotic consumption on antibiotic resistance. *BMC*  
534 *Infect Dis* 14:13.
- 535 7. European Centre for Disease Prevention and Control, European Food Safety Authority,  
536 European Medicines Agency (2017) ECDC/EFSA/EMA second joint report on the  
537 integrated analysis of the consumption of antimicrobial agents and occurrence of  
538 antimicrobial resistance in bacteria from humans and food-producing animals. *EFSA J* 15.  
539 doi:10.2903/j.efsa.2017.4872.
- 540 8. van de Sande-Bruinsma N, et al. (2008) Antimicrobial drug use and resistance in Europe.  
541 *Emerg Infect Dis* 14(11):1722–1730.
- 542 9. MacFadden DR, McGough SF, Fisman D, Santillana M, Brownstein JS (2018) Antibiotic  
543 resistance increases with local temperature. *Nat Clim Change* 8(6):510–514.
- 544 10. Shallcross L, Beckley N, Rait G, Hayward A, Petersen I (2017) Antibiotic prescribing  
545 frequency amongst patients in primary care: a cohort study using electronic health records.  
546 *J Antimicrob Chemother* 72(6):1818–1824.
- 547 11. Zhang Y, Steinman MA, Kaplan CM (2012) Geographic variation in outpatient antibiotic  
548 prescribing among older adults. *Arch Intern Med* 172:1465–1471.
- 549 12. Enzler MJ, Berbari E, Osmon DR (2011) Antimicrobial prophylaxis in adults. *Mayo Clin*  
550 *Proc* 86:686–701.
- 551 13. Lau JSY, et al. (2017) Surveillance of life-long antibiotics: a review of antibiotic  
552 prescribing practices in an Australian Healthcare Network. *Ann Clin Microbiol Antimicrob*  
553 16(1):3.



- 554 14. Berrington A (2010) Antimicrobial prescribing in hospitals: be careful what you measure. *J*  
555 *Antimicrob Chemoth* 65:163–168.
- 556 15. Turnidge J, Christiansen K (2005) Antibiotic use and resistance--proving the obvious.  
557 *Lancet Lond Engl* 365(9459):548–549.
- 558 16. Costelloe C, Metcalfe C, Lovering A, Mant D, Hay AD (2010) Effect of antibiotic  
559 prescribing in primary care on antimicrobial resistance in individual patients: systematic  
560 review and meta-analysis. *BMJ* 340:c2096.
- 561 17. Hillier S, et al. (2007) Prior antibiotics and risk of antibiotic-resistant community-acquired  
562 urinary tract infection: a case-control study. *J Antimicrob Chemother* 60:92–9.
- 563 18. Carothers JJ, et al. (2007) The relationship between previous fluoroquinolone use and  
564 levofloxacin resistance in *Helicobacter pylori* infection. *Clin Infect Dis* 44:e5-8.
- 565 19. Arason VA, et al. (1996) Do antimicrobials increase the carriage rate of penicillin resistant  
566 pneumococci in children? Cross sectional prevalence study. *BMJ* 313(7054):387–391.
- 567 20. Nasrin D, et al. (2002) Effect of beta lactam antibiotic use in children on pneumococcal  
568 resistance to penicillin: prospective cohort study. *BMJ* 324:28–30.
- 569 21. McMahon BJ, et al. (2003) The Relationship among Previous Antimicrobial Use,  
570 Antimicrobial Resistance, and Treatment Outcomes for *Helicobacter pylori* Infections. *Ann*  
571 *Intern Med* 139(6):463.
- 572 22. Catry B, et al. (2018) Characteristics of the antibiotic regimen that affect antimicrobial  
573 resistance in urinary pathogens. *Antimicrob Resist Infect Control* 7(1). doi:10.1186/s13756-  
574 018-0368-3.
- 575 23. Huttner B, Samore M (2011) Outpatient Antibiotic Use in the United States: Time to “Get  
576 Smarter.” *Clin Infect Dis* 53(7):640–643.
- 577 24. Schechner V, Temkin E, Harbarth S, Carmeli Y, Schwaber MJ (2013) Epidemiological  
578 interpretation of studies examining the effect of antibiotic usage on resistance. *Clin*  
579 *Microbiol Rev* 26(2):289–307.
- 580 25. Truven Health MarketScan Database (2015) *Commercial Claims and Encounters* (Ann  
581 Arbor, MI).
- 582 26. Public Health Agency of Sweden, National Veterinary Institute (2015) *Consumption of*  
583 *antibiotics and occurrence of antibiotic resistance in Sweden* Available at:  
584 <https://www.folkhalsomyndigheten.se/pagefiles/20281/Swedres-Svarm-2014-14027.pdf>.
- 585 27. Public Health England (2014) *English Surveillance Programme for Antimicrobial*  
586 *Utilisation and Resistance (ESPAUR)* Available at:  
587 [https://www.gov.uk/government/uploads/system/uploads/attachment\\_data/file/362374/ESP](https://www.gov.uk/government/uploads/system/uploads/attachment_data/file/362374/ESP)  
588 [AUR\\_Report\\_2014\\_\\_3\\_.pdf](https://www.gov.uk/government/uploads/system/uploads/attachment_data/file/362374/ESP_AUR_Report_2014__3_.pdf).

- 589 28. Centers for Disease Control and Prevention (2017) Measuring Outpatient Antibiotic  
590 Prescribing. Available at: [https://www.cdc.gov/antibiotic-use/community/programs-  
measurement/measuring-antibiotic-prescribing.html](https://www.cdc.gov/antibiotic-use/community/programs-<br/>591 measurement/measuring-antibiotic-prescribing.html) [Accessed February 7, 2018].
- 592 29. Hicks LA, et al. (2015) US outpatient antibiotic prescribing variation according to  
593 geography, patient population, and provider specialty in 2011. *Clin Infect Dis Off Publ  
594 Infect Dis Soc Am* 60(9):1308–1316.
- 595 30. Suskind AM, et al. (2016) Incidence and Management of Uncomplicated Recurrent Urinary  
596 Tract Infections in a National Sample of Women in the United States. *Urology* 90:50–5.
- 597 31. Owusu-Edusei K, Carroll DS, Gift TL (2015) Examining Fluoroquinolone Claims Among  
598 Gonorrhea-Associated Prescription Drug Claims, 2000-2010. *Am J Prev Med* 49:761–764.
- 599 32. Arizpe A, Reveles KR, Aitken SL (2016) Regional variation in antibiotic prescribing  
600 among medicare part D enrollees, 2013. *BMC Infect Dis* 16(1):744.
- 601 33. Bruyndonckx R, et al. (2015) Exploring the association between resistance and outpatient  
602 antibiotic use expressed as DDDs or packages. *J Antimicrob Chemother* 70(4):1241–1244.
- 603 34. Hicks LA, Taylor TH, Hunkler RJ (2013) U.S. outpatient antibiotic prescribing, 2010. *N  
604 Engl J Med* 368:1461–2.
- 605 35. MacFadden DR, et al. (2016) A Platform for Monitoring Regional Antimicrobial  
606 Resistance, Using Online Data Sources: ResistanceOpen. *J Infect Dis* 214(suppl\_4):S393–  
607 S398.
- 608 36. Wang A, Daneman N, Tan C, Brownstein JS, MacFadden DR (2017) Evaluating the  
609 Relationship Between Hospital Antibiotic Use and Antibiotic Resistance in Common  
610 Nosocomial Pathogens. *Infect Control Hosp Epidemiol* 38:1457–1463.
- 611 37. Hindler JF, Stelling J (2007) Analysis and presentation of cumulative antibiograms: a new  
612 consensus guideline from the Clinical and Laboratory Standards Institute. *Clin Infect Dis  
613* 44:867–73.
- 614 38. MacDougall C, Powell JP, Johnson CK, Edmond MB, Polk RE (2005) Hospital and  
615 community fluoroquinolone use and resistance in *Staphylococcus aureus* and *Escherichia  
616 coli* in 17 US hospitals. *Clin Infect Dis* 41:435–40.
- 617 39. Kanjilal S, et al. (2017) Trends in antibiotic susceptibility in *Staphylococcus aureus* in  
618 Boston, Massachusetts, 2000-2014. *J Clin Microbiol*. doi:10.1128/JCM.01160-17.
- 619 40. Garcia-Rodriguez JA, Fresnadillo Martinez MJ (2002) Dynamics of nasopharyngeal  
620 colonization by potential respiratory pathogens. *J Antimicrob Chemother* 50 Suppl S2:59–  
621 73.
- 622 41. Dartmouth Atlas of Health Care Research methods.

- 623 42. Schisterman EF, Perkins NJ, Mumford SL, Ahrens KA, Mitchell EM (2017) Collinearity  
624 and Causal Diagrams: A Lesson on the Importance of Model Specification. *Epidemiol*  
625 *Camb Mass* 28(1):47–53.
- 626 43. Priest P, Wise R, Yudkin P, McNulty C, Mant D (2001) Antibacterial prescribing and  
627 antibacterial resistance in English general practice: cross sectional study. *BMJ*  
628 323(7320):1037–1041.
- 629 44. Magee JT, Pritchard EL, Fitzgerald KA, Dunstan FD, Howard AJ (1999) Antibiotic  
630 prescribing and antibiotic resistance in community practice: retrospective study, 1996–8.  
631 *BMJ* 319:1239–40.
- 632 45. Livermore DM, et al. (2000) Regional variation in ampicillin and trimethoprim resistance in  
633 *Escherichia coli* in England from 1990 to 1997, in relation to antibacterial prescribing. *J*  
634 *Antimicrob Chemother* 46(3):411–422.
- 635 46. Tedijanto C, Olesen SW, Grad Y, Lipsitch M Estimating the proportion of bystander  
636 selection for antibiotic resistance among potentially pathogenic bacterial flora. *Proc Natl*  
637 *Acad Sci*.
- 638 47. Hicks LA, Chien Y-W, Taylor TH, Haber M, Klugman KP (2011) Outpatient Antibiotic  
639 Prescribing and Nonsusceptible *Streptococcus pneumoniae* in the United States, 1996–  
640 2003. *Clin Infect Dis* 53(7):631–639.
- 641 48. Knight GM, et al. (2018) Quantifying where human acquisition of antibiotic resistance  
642 occurs: a mathematical modelling study. *BMC Med* 16(1):137.
- 643 49. Lipsitch M (2001) The rise and fall of antimicrobial resistance. *Trends Microbiol* 9(9):438–  
644 444.
- 645 50. Hennessy TW, et al. (2002) Changes in antibiotic-prescribing practices and carriage of  
646 penicillin-resistant *Streptococcus pneumoniae*: A controlled intervention trial in rural  
647 Alaska. *Clin Infect Dis* 34:1543–50.
- 648 51. Pouwels KB, et al. (2018) Association between use of different antibiotics and  
649 trimethoprimresistance: going beyond the obvious crude association. *J Antimicrob*  
650 *Chemoth*. doi:10.1093/jac/dky031.
- 651 52. Weber SG, Gold HS, Hooper DC, Karchmer AW, Carmeli Y (2003) Fluoroquinolones and  
652 the risk for methicillin-resistant *Staphylococcus aureus* in hospitalized patients. *Emerg*  
653 *Infect Dis* 9:1415–22.
- 654 53. Van Boeckel TP, et al. (2014) Global antibiotic consumption 2000 to 2010: an analysis of  
655 national pharmaceutical sales data. *Lancet Infect Dis* 14(8):742–750.
- 656 54. Steiner JF, Prochazka AV (1997) The assessment of refill compliance using pharmacy  
657 records: methods, validity, and applications. *J Clin Epidemiol* 50:105–116.

- 658 55. Harbarth S, Harris AD, Carmeli Y, Samore MH (2001) Parallel analysis of individual and  
659 aggregated data on antibiotic exposure and resistance in gram-negative bacilli. *Clin Infect*  
660 *Dis* 33:1462–1468.
- 661 56. Lipsitch M, Samore MH (2002) Antimicrobial use and antimicrobial resistance: a  
662 population perspective. *Emerg Infect Dis* 8:347–354.
- 663 57. B. R. Levin, et al. (1997) The population genetics of antibiotic resistance. *Clin Infect Dis*  
664 24. doi:10.1093/clinids/24.supplement\_1.s9.
- 665 58. Colijn C, et al. (2010) What is the mechanism for persistent coexistence of drug-susceptible  
666 and drug-resistant strains of *Streptococcus pneumoniae*? *J R Soc Interface* 7(47):905–919.
- 667 59. Olesen SW, Barnett ML, MacFadden DR, Lipsitch M, Grad YH (2018) Trends in outpatient  
668 antibiotic use and prescribing practice among US older adults, 2011–15: observational  
669 study. *BMJ*:k3155.
- 670 60. Benjamini Y, Hochberg Y (1995) Controlling the false discovery rate: a practical and  
671 powerful approach to multiple testing. *J R Stat Soc Ser B Stat Methodol* 57:289–300.
- 672
